# Supplementary material for: Hydrophobic W18O49 mesocrystal on hydrophilic PTFE membrane as an efficient solar steam generation device under one sun
Source: Royal Society of Chemistry journal article supplement (doi:10.1039/c8ta02700e), 2018-01-01
Supplement: c8ta02700e1.pdf [file c8ta02700e1.pdf]

## Hydrophobic $W_{18}O_{49}$ mesocrystal on hydrophilic PTFE membrane as efficient solar steam generation device under one sun

Yuhong Chang,<sup>a</sup> Zhenguang Wang,<sup>b</sup> Yu-e Shi,<sup>b</sup> Xicheng Ma,<sup>a</sup> Long Ma,<sup>c</sup> Yuqiang Zhang,<sup>c</sup> and  
Jinhua Zhan<sup>\*a</sup>

<sup>a</sup> Key Laboratory of Colloid and Interface Chemistry Ministry of Education, Department of  
Chemistry, Shandong University, Jinan 250100, Shandong, China.

<sup>b</sup> College of Chemistry and Environmental Science, Hebei University, No.180 Wusi East Road,  
Baoding 071002, Hebei, China

<sup>c</sup> The Testing Center of Shandong Bureau of China Metallurgical Geology Bureau, Jinan, 250100,  
China

\*Email: [jhzhan@sdu.edu.cn](mailto:jhzhan@sdu.edu.cn)

Fig. S1 XRD patterns of  $W_{18}O_{49}$  mesocrystal with and without PDMS.

Fig. S2 HRTEM images of  $W_{18}O_{49}$  mesocrystal without (a) and with (b) PDMS. All scale bars are  
50 nm.

Fig. S3 XPS survey spectra of  $W_{18}O_{49}$  mesocrystal (a) without and (b) with PDMS.

Fig. S4 Plots of  $(\alpha h\nu)^{1/2}$  vs  $h\nu$  of  $W_{18}O_{49}$  and  $W_{18}O_{49}@PDMS$  mesocrystals

Fig. S5. The absorption coefficients of (a)  $W_{18}O_{49}$  and (b)  $W_{18}O_{49}@PDMS$  mesocrystals.

Fig. S6 Dynamic wetting of water droplet on PTFE membrane.

Fig. S7 The sketch of the design used to evaluate the prepared membrane.

Fig. S8 The evaporation cycle performance of  $W_{18}O_{49}@PDMS$  mesocrystal membrane with  
 $M/A=9.83$  g/m<sup>2</sup> under one sun irradiation for 3600s.

Fig. S9 Evaporation efficiency for PTFE membrane and  $W_{18}O_{49}@PDMS$  mesocrystal.

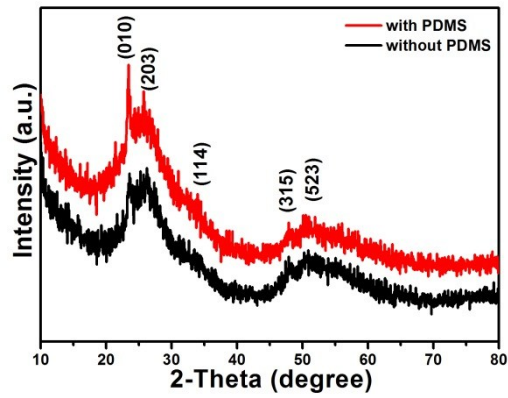

Fig. S1 XRD patterns of  $W_{18}O_{49}$  mesocrystal with and without PDMS.

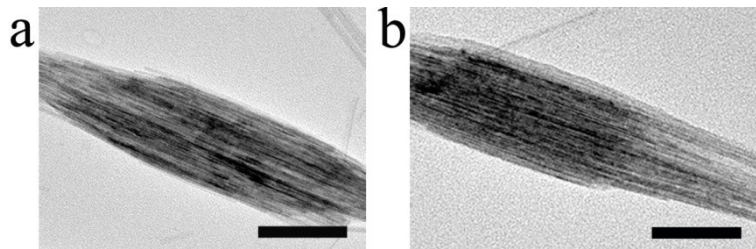

Fig. S2 TEM images of  $W_{18}O_{49}$  mesocrystal without (a) and with (b) PDMS. All scale bars are 50 nm.

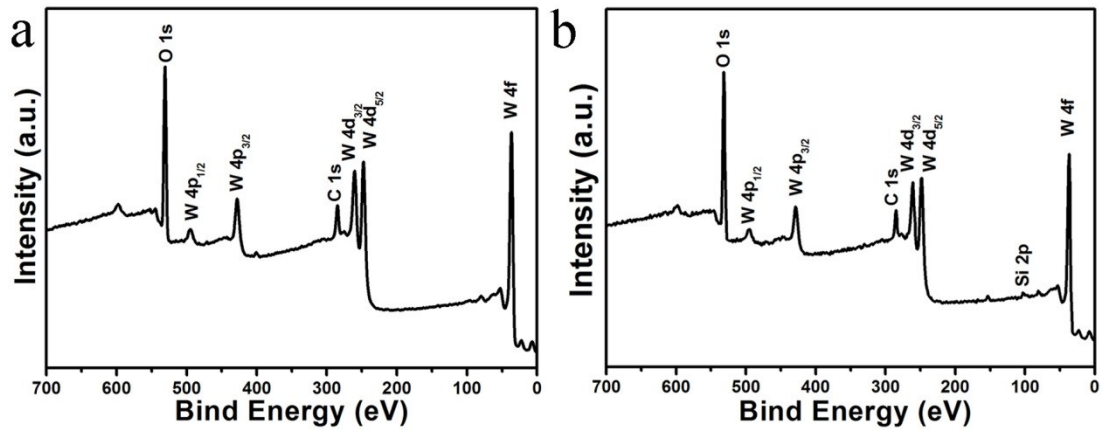

Fig. S3 XPS survey spectra of  $W_{18}O_{49}$  mesocrystal (a) without and (b) with PDMS.

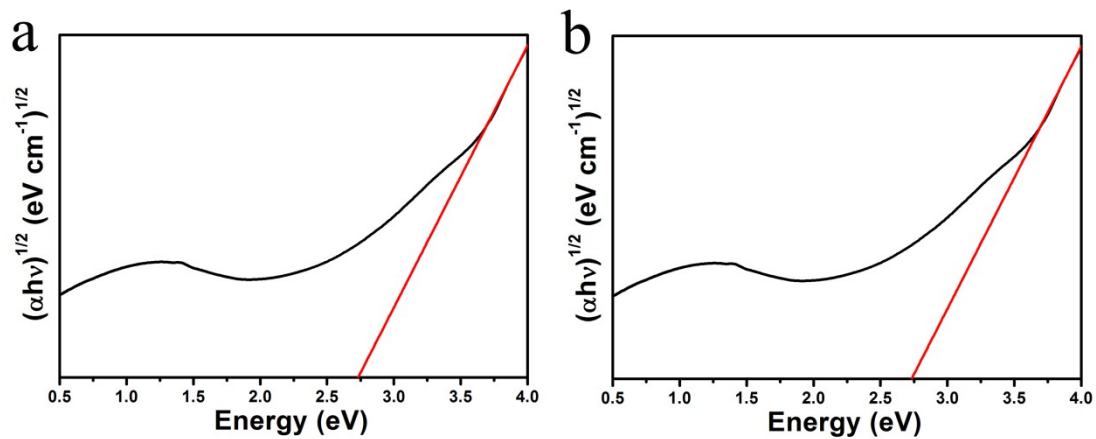

Fig. S4 Plots of  $(\alpha h\nu)^{1/2}$  vs  $h\nu$  of (a)  $W_{18}O_{49}$  and (b)  $W_{18}O_{49}@PDMS$  mesocrystals

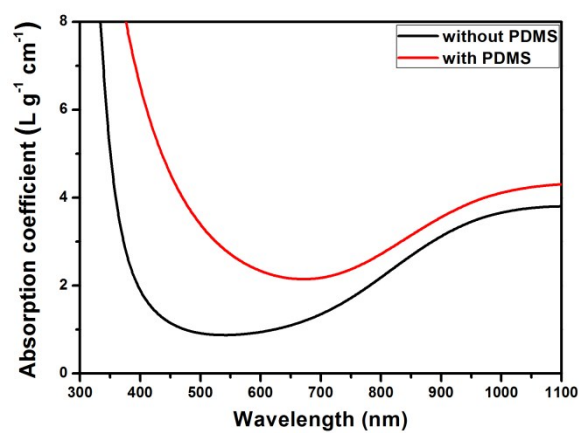

Fig. S5. The absorption coefficients of  $W_{18}O_{49}$  and  $W_{18}O_{49}@PDMS$  mesocrystals.

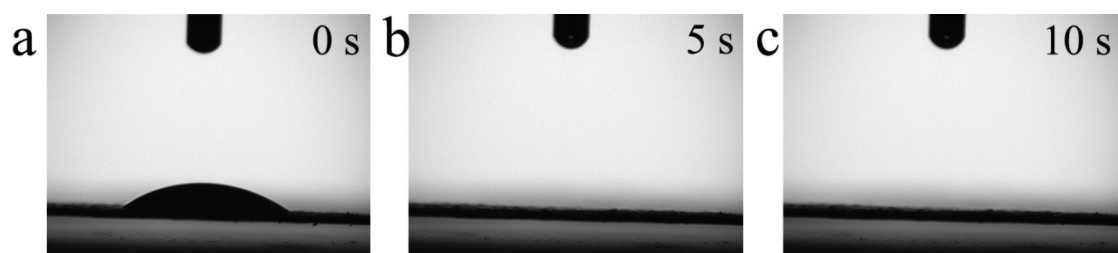

Fig. S6 Dynamic wetting of water droplet on PTFE membrane.

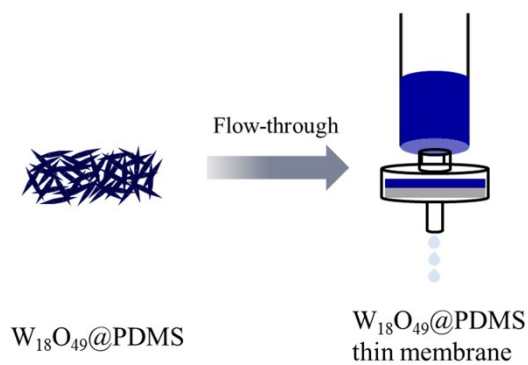

Fig. S7 The sketch of the design used to evaluate the prepared membrane.

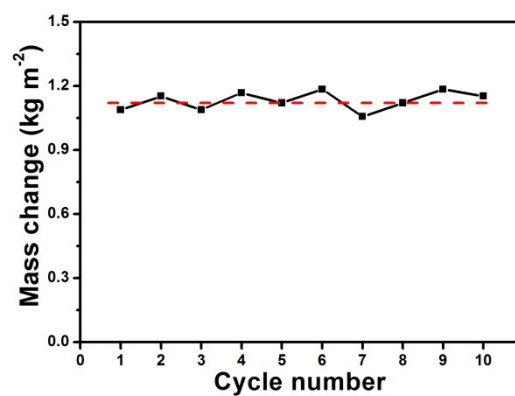

Fig. S8 The evaporation cycle performance of  $W_{18}O_{49}@PDMS$  mesocrystal membrane with  $M/A=9.83$  g/m<sup>2</sup> under one sun irradiation for 3600s.

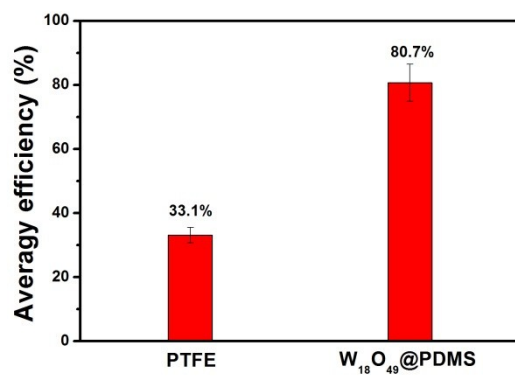

Fig. S9 Evaporation efficiency for PTFE membrane and  $W_{18}O_{49}@PDMS$  mesocrystal.
